# Errata

Errata relating to H. Blok's ASME Paper No. 74-Lub-44, TRANS. ASME, JOURNAL OF LUBRICATION TECHNOLOGY, Vol. 97, Series F, No. 2, Apr. 1975, pp. 168-179, "Full Journal Bearings Under Dynamic Duty: Impulse Method of Solution and Flapping Action"

| LOCATION       | IN PRINT                                                                                                                                                                                                                                                      | CORRECT FORM                                                                                                                                                                                     |
|----------------|---------------------------------------------------------------------------------------------------------------------------------------------------------------------------------------------------------------------------------------------------------------|--------------------------------------------------------------------------------------------------------------------------------------------------------------------------------------------------|
| Equation (4d)  | $dJ_n = \left(\frac{\Delta R}{R}\right) J_{\text{spec}}/\mu$                                                                                                                                                                                                  | $dJ_n = \left(\frac{\Delta R}{R}\right)^2 \cdot J_{\text{spec}}/\mu$                                                                                                                             |
| Equation (6a)  | $\Omega_u dt = d\gamma_u dt$                                                                                                                                                                                                                                  | $\Omega_u dt = d\gamma_u$                                                                                                                                                                        |
| Equation (13a) | $\frac{Wdt}{\mu R_{c,t}} = 6\pi\sqrt{2}d \left[ \frac{R_{c,t}^{1/2}}{h_{\min,t}} \right]$                                                                                                                                                                     | $\frac{Wdt}{\mu \cdot R_{c,t}} = 6\pi\sqrt{2}d \left[ \frac{R_{c,t}}{h_{\min,t}} \right]^{1/2}$                                                                                                  |
| Equation (13b) | $J_{n,f} = \left(\frac{\Delta R_u}{R}\right)^2 \cdot \frac{1}{\mu} \int Wdt$                                                                                                                                                                                  | $J_{n,f} = \left(\frac{\Delta R_u}{R}\right)^2 \cdot \frac{1}{\mu} \int \frac{W}{2R} dt$                                                                                                         |
| Equation (13c) | $dJ_{n,f} = 3\pi\sqrt{2} \frac{R_{c,t}}{R} \cdot d \left[ \left(\frac{R_{c,t}}{R}\right)^{1/2} \cdot \left(\frac{\Delta R_u}{h_{\min,t}}\right)^{1/2} \right]$                                                                                                | $dJ_{n,f} = 3\pi\sqrt{2} \left(\frac{\Delta R_u}{R}\right)^{3/2} \cdot \frac{R_{c,t}}{R} \cdot d \left[ \frac{R_{c,t}}{R} \cdot \frac{\Delta R_u}{h_{\min,t}} \right]^{1/2}$                     |
| Equation (13d) | $dJ_{n,f} = 3\pi\sqrt{2} \frac{R}{\Delta R_t} \cdot d \left[ \left(\frac{R}{\Delta R_t}\right)^{1/2} \cdot \left(\frac{\Delta R_u}{h_{\min,t}}\right)^{1/2} \right]$                                                                                          | $dJ_{n,f} = 3\pi\sqrt{2} \left(\frac{\Delta R_u}{R}\right)^{3/2} \cdot \frac{R}{\Delta R_t} \cdot d \left[ \frac{R}{\Delta R_t} \cdot \frac{\Delta R_u}{h_{\min,t}} \right]^{1/2}$               |
| Equation (14b) | $\frac{d}{dt} \left[ 1 - \frac{\Delta R_{b,t}}{\Delta R_u} \right]^{3/2} = \frac{1}{2\pi\sqrt{2}} \cdot \frac{1}{\mu} \left( \frac{\Delta R_u^6 h_{\min}^{1/2}}{R^9} \right) \cdot W(t)$                                                                      | $\frac{d}{dt} \left[ 1 - \frac{\Delta R_{b,t}}{\Delta R_u} \right]^{-3/2} = \frac{1}{\pi\sqrt{2}} \cdot \left[ \frac{\Delta R_u^3 h_{\min}}{R^4} \right]^{1/2} \cdot \frac{W(t)}{\mu \cdot 2R}$  |
| Equation (15)  | $\Delta J_{n,f} = \pi\sqrt{2} \left(\frac{\Delta R_u}{h_{\min}}\right)^{1/2} \cdot \left(\frac{\Delta R_u}{\Delta R_c}\right)^{1/2} \cdot \left[ \left(\frac{\Delta R_u}{\Delta R_t}\right)^{3/2} - \left(\frac{\Delta R_u}{\Delta R_0}\right)^{3/2} \right]$ | $\Delta J_{n,f} = \pi\sqrt{2} \left(\frac{\Delta R_u}{h_{\min}}\right)^{1/2} \left[ \left(\frac{\Delta R_u}{\Delta R_t}\right)^{3/2} - \left(\frac{\Delta R_u}{\Delta R_0}\right)^{3/2} \right]$ |
